# Supplementary material for: Implementation of Back At work After Surgery (BAAS): a feasibility study of an integrated pathway for improved return to work after knee arthroplasty
Source: Research Square preprint supplement (doi:10.21203/rs.3.rs-1361542/v2), 2022-03-09
Supplement: Supplementary file 1 [file 187cffd67a58495d550e33cf.docx]

Table 2:Preoperative patient characteristics for participants in the Back At work After Surgery (BAAS) clinical pathway

|  | **Median [Q1-Q3]ꝉ or number (percentage)*** | **Missing data (percentage)** |
| --- | --- | --- |
| **Age†** | 59 [57-60] | 0 |
| **Sex‡** |  | 0 |
| - male | 4 (36%) |  |
| - female | 7 (64%) |  |
| **Surgery‡** |  | 0 |
| - UKA | 3 (27%) |  |
| - TKA | 8 (73%) |  |
| **Length of stay (days) †** | 2 [2-2.5] | 0 |
| **Number of patients reported preoperative sick leave > 2 weeks*** | 1 (9%) | 0 |
| **Knee demanding work‡** |  | 0 |
| - Low | 2 (18%) |  |
| - Medium | 4 (36%) |  |
| - High | 5 (45%) |  |
| **Level of education‡** |  | 0 |
| - Low | 5 (45%) |  |
| - Medium | 3 (27%) |  |
| - High | 3 (27%) |  |
| **Functioning†** |  |  |
| - DEMMI (range 0-100) | 85 [85-100] | 2 (18%) |
| - 6 MWT | 407 [397-449] | 2 (18%) |
| - 5 STST | 11.4 [10.3-12.7] | 2 (18%) |
| **Patient reported outcomes†** |  |  |
| - CSI (range 0-100) | 23 [16.5-31.5] | 1 (9%) |
| - KOOS |  | 1 (9%) |
| - - Symptoms (range 0-100) | 42.9 [33.9-51.8] |  |
| - - Pain (range 0-100) | 47.2 [38.9-50] |  |
| - - Activities (range 0-100) | 57.4 [52.2-64.0] |  |
| - - Sport participation (range 0-100) | 5 [0-17.5] |  |
| - - Quality of life (range 0-100) | 18.8 [6.3-28.1] |  |
| - WORQ (range 0-52) | 42 [36.5-58.7] | 1 (9%) |
| **Return to work †** |  |  |
| - Weeks to start return to work | 6.4 [6-8.1] | 0 |
| - Weeks to fully return to work | 12.4 [9.8-14.4] | 0 |
| †*= Numeric variables,* ‡ *= categorical variables. Abbreviations: 5 STST: 5 time sit-to-stand test, 6MWD = 6 minute walking test, CSI = Central Sensitization Inventory, DEMMI = de Morton Mobility Index, KOOS: Knee Osteoarthritis Outcome Score, WORQ = Work, Osteoarthritis and joint-Replacement Questionnaire; TKA = Total Knee Arthroplasty; UKA = Unicompartmental Knee Arthroplasty.* | | |

Table 3: Feasibility outcomes of the Back At Work after Surgery (BAAS) clinical pathway

|  | Number (%) |
| --- | --- |
| **Reach** |  |
| - Number of patients who met inclusion criteria | 29 (100) |
| - Number of patients included | 11 (38) |
| - Number of cases where occupational physician was willing to participate | 11 (100) |
| - Number of cases where employer was willing to participate | 11 (100) |
| - Number of cases where OCM was involved | 11 (100) |
| - Number of cases where MCM was involved | 11 (100) |
| **Dose delivered (OS/MCM/OCM/OP/MDR)** |  |
| - Information return-to-work from orthopedic surgeon | 2 (18) |
| - Advice given to contact occupational physician before surgery | 10 (100) |
| - Invitation sent for preoperative screening by MCM   - Set work-related goal before surgery | 10 (91) 10 (91) |
| - Physical therapy received until full return to work | 11(100) |
| - Contact OCM   - Reach out before surgery   - Reach out after surgery | 11 (100) 4 (36) 7 (64) |
| - Multi-disciplinary consult organized | 11 (100) |
| - Accelerometer and information about usage was given | 11 (100) |
| - Patients seen for quick scan before IVR | 1 (100) |
| **Dose received (patients)** |  |
| - Information return-to-work from orthopedic surgeon | 2 (100) |
| - Contact with occupational physician   - Start before surgery   - Start after surgery | 10 (100) 3 (30) 10 (100) |
| - Preoperative screening by MCM   - Set work-related goal before surgery | 10 (100)  10 (100) |
| - Physical therapy received until full return to work | 11 (100) |
| - Contact OCM   - Before surgery   - After surgery | 11 (100) 2 (50) 10 (91) |
| - Multi-disciplinary consult | 11 (100) |
| - Contact employer about return-to-work   - Before surgery   - After surgery | 10 (100)* 3 (27) 10 (100)* |
| - Accelerometer   - Worn daily | 11 (100) 11 (100) |
| **Fidelity** |  |
| - Number of difficulties mentioned by OCM and MCM - Number of improvements mentioned by OCM and MCM | 9  5 |
| **Patients’ attitude** |  |
| - Patient satisfied - Improvements mentioned | 11 (100)  1 (9) |
| *Aberrations: MCM = medical case manager, OCM = occupational case manager, IVR = interdisciplinary vocational rehabilitation, OS = orthopedic surgeon, OP = occupational physician.* | |

Table 4: Shortcomings and solutions mentioned by medical and occupational case managers

| **Shortcomings** | **Solutions** |
| --- | --- |
| - In multiple cases, it was hard to get in contact with the occupational physician (4 out of 11) or employer (3 out of 11); | - Compiling an information letter regarding the BAAS clinical pathway, which is sent to the OP and employer to improve communication with OP and employers; |
| - In three cases, the communication between OCM and MCM was not optimal given that the MCM was not informed when the report was finished or the OCM was not kept up to speed on cases regarding the RTW process; | - In case an OP is not involved, the OCM and MCM will advise the patient on RTW; |
| - The report made by OCM often came after surgery instead of before surgery (9 out of 11). This was due to the variability between the long waiting time before surgery during the SARS-COVID-19 outbreaks in the Netherlands and sudden short waiting times when surgery was possible to perform after the outbreak periods; | - Investigate whether employers can join the MDO if patients provide informed consent regarding discussing their work-related disabilities; |
| - The OCM had a hard time figuring out which patient had fully returned to work and therefore which cases could be closed; | - Organize a meeting every two weeks between OCM and MCM to discuss progress to improve communication between OCM and MCM; |
| - In one case, an occupational physician was not involved because the patient was self-employed and had no contract with an occupational physician or health service. Therefore, no occupational physician was present during the RTW; | - Announce new patients to OCM directly after signing informed consent and implement a maximum period of 20 days between announcement and finishing the OCM report. |
| - Two patients went on holiday in the RTW period and therefore the rehabilitation and RTW process was postponed. This may have led to a longer RTW period; |  |
| - The report of the OCM was not always up to date given that one patient was fired during the RTW period and one patient switched jobs before surgery while the report from OCM was already compiled, which delayed or complicated RTW; |  |
| *Aberrations: MCM = medical case manager, OCM = occupational case manager, OP = occupational physician, RTW = return to work.* | |
